# Supplementary material for: Synthesis, characterization, crystal structure, and molecular docking of o-vanillin and l-valine derived molecules: a DFT study and antiproliferative activity against the PANC-1 cancer cell line
Source: Royal Society of Chemistry journal article supplement (doi:10.1039/d4nj03401e), 2024-10-01
Supplement: d4nj03401e1.pdf [file d4nj03401e1.pdf]

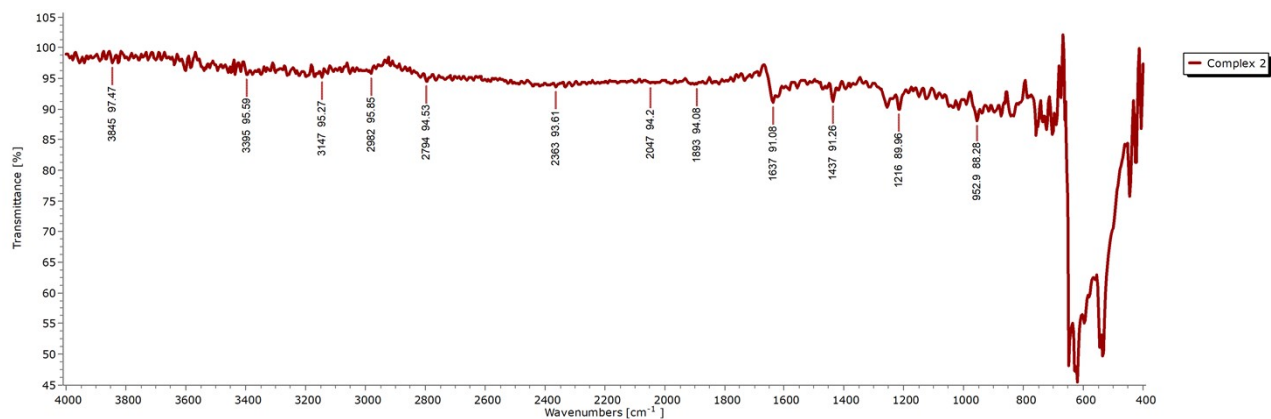

**FigureS3: FTIR spectra of L<sub>2</sub>-Cu- Bipyridine complex (complex2)**

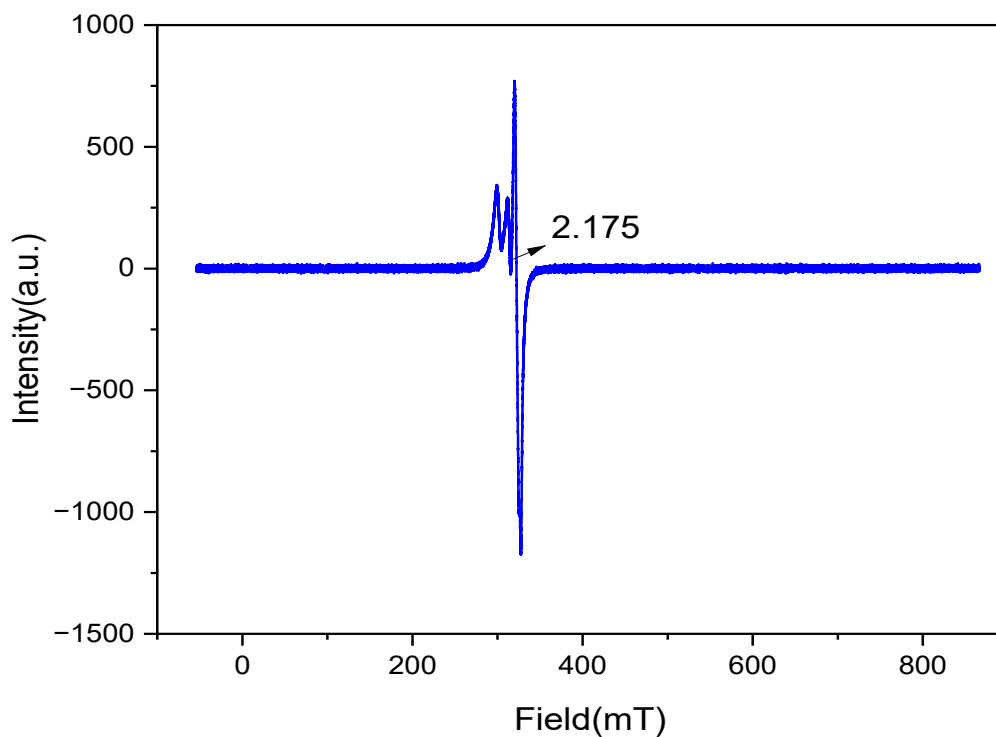

**FigureS4: EPR spectrum of Cu (II) complex1**

**Table S1.** Crystallographic table and structure refinement parameters for **1**.

|                                     |                                                                 |
|-------------------------------------|-----------------------------------------------------------------|
| Compound                            | <b>1</b>                                                        |
| Empirical formula                   | C <sub>23</sub> H <sub>23</sub> CuN <sub>3</sub> O <sub>4</sub> |
| Formula weight /g mol <sup>-1</sup> | 468.98                                                          |

|                                              |                                                               |
|----------------------------------------------|---------------------------------------------------------------|
| Temperature / K                              | 296                                                           |
| Crystal system                               | Orthorhombic                                                  |
| Space group                                  | $P2_12_12_1$                                                  |
| $a/\text{\AA}$                               | 8.9536(2)                                                     |
| $b/\text{\AA}$                               | 10.3106(2)                                                    |
| $c/\text{\AA}$                               | 23.2792(4)                                                    |
| $\alpha, \beta, \gamma / ^\circ$             | 90                                                            |
| Volume/ $\text{\AA}^3$                       | 2149.07(7)                                                    |
| Z                                            | 4                                                             |
| $d_{\text{cal}}/\text{g cm}^{-3}$            | 1.449                                                         |
| $\mu/\text{mm}^{-1}$                         | 1.051                                                         |
| F(000)                                       | 972                                                           |
| $\theta$ range for data collection/ $^\circ$ | 1.750 to 26.429                                               |
| Index ranges                                 | $-11 \leq h \leq 11, -12 \leq k \leq 12, -29 \leq l \leq 29$  |
| Completeness                                 | 0.999                                                         |
| Reflections collected                        | 98276                                                         |
| Independent reflections                      | 4411 [ $R_{\text{int}} = 0.0236, R_{\text{sigma}} = 0.0116$ ] |
| Data/restraints/parameters                   | 4411/0/292                                                    |
| Goodness-of-fit on $F^2$                     | 1.041                                                         |
| Final R indices [ $ I  \geq 2\sigma(I)$ ]    | $R_1 = 0.0208, wR_2 = 0.0578$                                 |
| Final R indices [all data]                   | $R_1 = 0.0229, wR_2 = 0.0589$                                 |
| Largest diff. peak/hole/ $e \text{\AA}^3$    | 0.18/-0.22                                                    |
| CCDC number                                  | 2240174                                                       |

---

**Table S2: Selected bond length/bond angle of complex1 obtained from optimized geometry**

| <b>Bond angle (<sup>0</sup>)/Bond length (Å) Complex 1</b> | <b>Theoretical values</b> |
|------------------------------------------------------------|---------------------------|
| O(1)–Cu(1)–O(2)                                            | 98.78                     |
| O(2)–Cu(1)–O(3)                                            | 82.19                     |
| O(3)–Cu(1)–O(4)                                            | 88.00                     |
| O(4)–Cu(1)–O(1)                                            | 92.16                     |
| N(1)–Cu(1)–N(2)                                            | 169.08                    |
| N(1)–Cu(1)–O(1)                                            | 82.18                     |
| N(1)–Cu(1)–O(2)                                            | 98.82                     |
| N(1)–Cu(1)–O(3)                                            | 90.28                     |
| N(1)–Cu(1)–O(4)                                            | 88.00                     |
| N(2)–Cu(1)–O(1)                                            | 89.14                     |
| N(2)–Cu(1)–O(2)                                            | 98.23                     |
| N(2)–Cu(1)–O(3)                                            | 83.06                     |
| N(2)–Cu(1)–O(4)                                            | 89.27                     |
| Cu-O(1)(pheno)                                             | 2.09                      |
| Cu-O(2)(Phen)                                              | 2.04                      |
| Cu-O(1)(carbox)                                            | 2.01                      |
| Cu-O(2)(carbox)                                            | 2.02                      |
| Cu-N1(imine)                                               | 2.00                      |
| Cu-N2(imine)                                               | 2.01                      |

**Table S3: Details of Binding mode/interaction and energy of both the molecules with receptor Epidermal Growth Factor Receptor (EGFR) and Tyrosine Kinase(TRK)**

| Test molecule | R Receptor | Binding energy (Kcal/mol) | Hydrogen bonding |                 | Hydrophobic |                 | Salt bridge/WATER BRIDGE |             | $\pi$ - $\pi$ stacking | $\Pi$ -cation | Inhibition constant |
|---------------|------------|---------------------------|------------------|-----------------|-------------|-----------------|--------------------------|-------------|------------------------|---------------|---------------------|
|               |            |                           | Residue          | Bond length (Å) | Residue     | Bond length (Å) | Residue                  | Bond length |                        |               |                     |

|                      |                                        |        |                                              |                              |                                                          |                        |                  |              |                                                      |                          |         |
|----------------------|----------------------------------------|--------|----------------------------------------------|------------------------------|----------------------------------------------------------|------------------------|------------------|--------------|------------------------------------------------------|--------------------------|---------|
| <b>Ligand</b>        | EGFR<br>Kinase<br>(pdb id<br>1m17)     | -6.37  | THR76<br>6                                   | 2.57                         | LEU694<br>VAL702<br>ASP831                               | 3.03<br>2.98<br>2.91   | --               | --           | --                                                   |                          | 25.96nM |
| <b>Complex<br/>1</b> |                                        | -10.87 | Glu738<br>THR76<br>6<br>THR83<br>0<br>ASP831 | 3.88<br>2.89<br>3.57<br>3.70 | LEU694<br>PHE699<br>VAL702<br>ALA719                     | 3.04 2.97<br>3.05 2.89 | ASP831           | 4.64         | PHE<br>699<br>LEU<br>768<br>MET<br>769<br>LEU<br>794 |                          | 469nM   |
| <b>Complex<br/>2</b> |                                        | -11.97 | LYS721<br>MET76<br>9<br>ASP831               | 2.36<br>4.02<br>3.87         | LEU694<br>PHE699<br>LEU820<br>ASP831                     | 3.11 3.67<br>2.91 3.89 | -                | -            | LYS<br>721<br>LEU<br>820<br>PHE<br>699               |                          | 534nM   |
| <b>Ligand</b>        | Tyrosine<br>Kinase<br>(pdb id<br>1t46) | -7.34  | Glu640<br>THR67<br>0                         | 2.86<br>2.98                 | GLU640<br>LEU644<br>VAL654                               | 3.77-3.92              |                  |              | PHE<br>811                                           | Lys6<br>23<br>HIS7<br>90 | 31.67nM |
| <b>Complex<br/>1</b> |                                        | -11.10 | THR67<br>0<br>CYS67<br>3<br>ASP810           | 2.98<br>2.80<br>3.08         | VAL603<br>LYS623<br>GLU640<br>LEU644<br>VAL654           | 3.99-4.12              | LYS623<br>ASP810 | 3.50<br>5.50 | PHE<br>811                                           | Lys6<br>23<br>HIS7<br>90 | 532nM   |
| <b>Complex<br/>2</b> |                                        | -11.97 | Glu640<br>THR67<br>0<br>CYS67<br>3<br>ASP810 | 2.86<br>2.98<br>2.80<br>3.08 | LEU595<br>VAL603<br>LYS623<br>GLU640<br>LEU644<br>VAL654 | 3.77-3.92              | LYS623<br>ASP810 | 3.21<br>5.23 | PHE<br>811                                           | Lys6<br>23<br>HIS7<br>90 | 578nM   |
